# Supplementary material
Source: ML conference proceedings conference paper supplement (https://proceedings.mlr.press/v70/du17a.html)
Supplement: Supplementary file [file du17a-supp.pdf]

## A Eigen-analysis of $G$

In this section, we give a thorough analysis of the spectral properties of the matrix

$$G = \begin{bmatrix} \rho I & -\beta^{1/2} \widehat{A}^T \\ \beta^{1/2} \widehat{A} & \beta \widehat{C} \end{bmatrix}, \quad (20)$$

which is critical in analyzing the convergence of the PDBG, SAGA and SVRG algorithms for policy evaluation. Here  $\beta = \sigma_w / \sigma_\theta$  is the ratio between the dual and primal step sizes in these algorithms. For convenience, we use the following notation:

$$\begin{aligned} L &\triangleq \lambda_{\max}(\widehat{A}^T \widehat{C}^{-1} \widehat{A}), \\ \mu &\triangleq \lambda_{\min}(\widehat{A}^T \widehat{C}^{-1} \widehat{A}). \end{aligned}$$

Under Assumption 1, they are well defined and we have  $L \geq \mu > 0$ .

### A.1 Diagonalizability of $G$

First, we examine the condition of  $\beta$  that ensures the diagonalizability of the matrix  $G$ . We cite the following result from (Shen et al., 2008).

**Lemma 1.** *Consider the matrix  $A$  defined as*

$$A = \begin{bmatrix} A & -B^T \\ B & C \end{bmatrix}, \quad (21)$$

where  $A \succeq 0$ ,  $C \succ 0$ , and  $B$  is full rank. Let  $\tau = \lambda_{\min}(C)$ ,  $\delta = \lambda_{\max}(A)$  and  $\sigma = \lambda_{\max}(B^T C^{-1} B)$ . If  $\tau > \delta + 2\sqrt{\tau\sigma}$  holds, then  $A$  is diagonalizable with all its eigenvalues real and positive.

Applying this lemma to the matrix  $G$  in (20), we have

$$\begin{aligned} \tau &= \lambda_{\min}(\beta \widehat{C}) = \beta \lambda_{\min}(\widehat{C}), \\ \delta &= \lambda_{\max}(\rho I) = \rho, \\ \sigma &= \lambda_{\max}(\beta^{1/2} \widehat{A}^T (\beta \widehat{C})^{-1} \beta^{1/2} \widehat{A}) = \lambda_{\max}(\widehat{A}^T \widehat{C}^{-1} \widehat{A}). \end{aligned}$$

The condition  $\tau > \delta + 2\sqrt{\tau\sigma}$  translates into

$$\beta \lambda_{\min}(\widehat{C}) > \rho + 2\sqrt{\beta \lambda_{\min}(\widehat{C}) \lambda_{\max}(\widehat{A}^T \widehat{C}^{-1} \widehat{A})},$$

which can be solved as

$$\sqrt{\beta} > \frac{\sqrt{\lambda_{\max}(\widehat{A}^T \widehat{C}^{-1} \widehat{A})} + \sqrt{\rho + \lambda_{\max}(\widehat{A}^T \widehat{C}^{-1} \widehat{A})}}{\sqrt{\lambda_{\min}(\widehat{C})}}.$$

In the rest of our discussion, we choose  $\beta$  to be

$$\beta = \frac{8(\rho + \lambda_{\max}(\widehat{A}^T \widehat{C}^{-1} \widehat{A}))}{\lambda_{\min}(\widehat{C})} = \frac{8(\rho + L)}{\lambda_{\min}(\widehat{C})}, \quad (22)$$

which satisfies the inequality above.

### A.2 Analysis of eigenvectors

If the matrix  $G$  is diagonalizable, then it can be written as

$$G = Q \Lambda Q^{-1},$$

where  $\Lambda$  is a diagonal matrix whose diagonal entries are the eigenvalues of  $G$ , and  $Q$  consists of its eigenvectors (each with unit norm) as columns. Our goal here is to bound  $\kappa(Q)$ , the condition number of the matrix  $Q$ . Our analysis is inspired by Liesen & Parlett (2008). The core is the following fundamental result from linear algebra.

**Theorem 4** (Theorem 5.1.1 of Gohberg et al. (2006)). *Suppose  $G$  is diagonalizable. If  $H$  is a symmetric positive definite matrix and  $HG$  is symmetric, then there exist a complete set of eigenvectors of  $G$ , such that they are orthonormal with respect to the inner product induced by  $H$ :*

$$Q^T H Q = I. \quad (23)$$

If  $H$  satisfies the conditions in Theorem 4, then we have  $H = Q^{-T} Q^{-1}$ , which implies  $\kappa(H) = \kappa^2(Q)$ . Therefore, in order to bound  $\kappa(Q)$ , we only need to find such an  $H$  and analyze its conditioning. To this end, we consider the matrix of the following form:

$$H = \begin{bmatrix} (\delta - \rho)I & \sqrt{\beta} \widehat{A}^T \\ \sqrt{\beta} \widehat{A} & \beta \widehat{C} - \delta I \end{bmatrix}. \quad (24)$$

It is straightforward to check that  $HG$  is a symmetric matrix. The following lemma states the conditions for  $H$  being positive definite.

**Lemma 2.** *If  $\delta - \rho > 0$  and  $\beta \widehat{C} - \delta I - \frac{\beta}{\delta - \rho} \widehat{A} \widehat{A}^T \succ 0$ , then  $H$  is positive definite.*

*Proof.* The matrix  $H$  in (24) admits the following Schur decomposition:

$$H = \begin{bmatrix} I & 0 \\ \frac{\sqrt{\beta}}{\delta - \rho} \widehat{A} & I \end{bmatrix} \begin{bmatrix} (\delta - \rho)I & \\ & S \end{bmatrix} \begin{bmatrix} I & \frac{\sqrt{\beta}}{\delta - \rho} \widehat{A}^T \\ 0 & I \end{bmatrix},$$

where  $S = \beta \widehat{C} - \delta I - \frac{\beta}{\delta - \rho} \widehat{A} \widehat{A}^T$ . Thus  $H$  is congruence to the block diagonal matrix in the middle, which is positive definite under the specified conditions. Therefore, the matrix  $H$  is positive definite under the same conditions.  $\square$

In addition to the choice of  $\beta$  in (22), we choose  $\delta$  to be

$$\delta = 4(\rho + L). \quad (25)$$

It is not hard to verify that this choice ensures  $\delta - \rho > 0$  and  $\beta \widehat{C} - \delta I - \frac{\beta}{\delta - \rho} \widehat{A} \widehat{A}^T \succ 0$  so that  $H$  is positive definite. We now derive an upper bound on the condition number of  $H$ . Let  $\lambda$  be an eigenvalue of  $H$  and  $[x^T y^T]^T$  be its associated eigenvector, where  $\|x\|^2 + \|y\|^2 > 0$ . Then it holds that

$$(\delta - \rho)x + \sqrt{\beta} \widehat{A}^T y = \lambda x, \quad (26)$$

$$\sqrt{\beta}\widehat{A}x + (\beta\widehat{C} - \delta I)y = \lambda y. \quad (27)$$

From (26), we have

$$x = \frac{\sqrt{\beta}}{\lambda - \delta + \rho} \widehat{A}^T y. \quad (28)$$

Note that  $\lambda - \delta + \rho \neq 0$  because if  $\lambda - \delta + \rho = 0$  we have  $\widehat{A}^T y = 0$  so that  $y = 0$  since  $\widehat{A}$  is full rank. With  $y = 0$  in (27), we will have  $\widehat{A}x = 0$  so that  $x = 0$ , which contradicts the assumption that  $\|x\|^2 + \|y\|^2 > 0$ .

Substituting (28) into (27) and multiplying both sides with  $y^T$ , we obtain the following equation after some algebra

$$\lambda^2 - p\lambda + q = 0, \quad (29)$$

where

$$p \triangleq \delta - \rho + \frac{y^T(\beta\widehat{C} - \delta I)y}{\|y\|^2},$$

$$q \triangleq (\delta - \rho) \frac{y^T(\beta\widehat{C} - \delta I)y}{\|y\|^2} - \beta \frac{y^T \widehat{A} \widehat{A}^T y}{\|y\|^2}.$$

We can verify that both  $p$  and  $q$  are positive with our choice of  $\delta$  and  $\beta$ . The roots of the quadratic equation in (29) are given by

$$\lambda = \frac{p \pm \sqrt{p^2 - 4q}}{2}. \quad (30)$$

Therefore, we can upper bound the largest eigenvalue as

$$\begin{aligned} \lambda_{\max}(H) &\leq \frac{p + \sqrt{p^2 - 4q}}{2} \\ &\leq p = \delta - \rho - \delta + \beta \frac{y^T \widehat{C} y}{\|y\|^2} \\ &\leq -\rho + \beta \lambda_{\max}(\widehat{C}) \\ &= -\rho + \frac{8(\rho + L)}{\lambda_{\min}(\widehat{C})} \lambda_{\max}(\widehat{C}) \\ &\leq 8(\rho + L) \kappa(\widehat{C}). \end{aligned} \quad (31)$$

Likewise, we can lower bound the smallest eigenvalue:

$$\begin{aligned} \lambda_{\min}(H) &\geq \frac{p - \sqrt{p^2 - 4q}}{2} \geq \frac{p - p + 2q/p}{2} = \frac{q}{p} \\ &= \frac{\beta \left( (\delta - \rho) \frac{y^T \widehat{C} y}{\|y\|^2} - \frac{y^T \widehat{A} \widehat{A}^T y}{\|y\|^2} \right) - \delta(\delta - \rho)}{-\rho + \beta \frac{y^T \widehat{C} y}{\|y\|^2}} \\ &\stackrel{(a)}{\geq} \frac{\beta \left( (\delta - \rho) \frac{y^T \widehat{C} y}{\|y\|^2} - \frac{y^T \widehat{A} \widehat{A}^T y}{\|y\|^2} \right) - \delta(\delta - \rho)}{\beta \frac{y^T \widehat{C} y}{\|y\|^2}} \\ &= \delta - \rho - \frac{y^T \widehat{A} \widehat{A}^T y}{y^T \widehat{C} y} - \frac{\delta(\delta - \rho)}{\beta} \cdot \frac{1}{\frac{y^T \widehat{C} y}{\|y\|^2}} \end{aligned}$$

$$\begin{aligned} &\stackrel{(b)}{\geq} \delta - \rho - L - \frac{\delta(\delta - \rho)}{\beta \lambda_{\min}(\widehat{C})} \\ &\stackrel{(c)}{=} (\rho + L) \left( 3 - \frac{3\rho + 4L}{2(\rho + L)} \right) \\ &\geq \rho + L, \end{aligned} \quad (32)$$

where step (a) uses the fact that both the numerator and denominator are positive, step (b) uses the fact

$$L \triangleq \lambda_{\max}(\widehat{A}^T \widehat{C}^{-1} \widehat{A}) \geq \frac{y^T \widehat{A} \widehat{A}^T y}{y^T \widehat{C} y},$$

and step (c) substitutes the expressions of  $\delta$  and  $\beta$ . Therefore, we can upper bound the condition number of  $H$ , and thus that of  $Q$ , as follows:

$$\kappa^2(Q) = \kappa(H) \leq \frac{8(\rho + L) \kappa(\widehat{C})}{\rho + L} = 8\kappa(\widehat{C}). \quad (33)$$

### A.3 Analysis of eigenvalues

Suppose  $\lambda$  is an eigenvalue of  $G$  and let  $(\xi^\top, \eta^\top)^\top$  be its corresponding eigenvector. By definition, we have

$$G \begin{bmatrix} \xi \\ \eta \end{bmatrix} = \lambda \begin{bmatrix} \xi \\ \eta \end{bmatrix},$$

which is equivalent to the following two equations:

$$\begin{aligned} \rho \xi - \sqrt{\beta} \widehat{A}^\top \eta &= \lambda \xi, \\ \sqrt{\beta} \widehat{A} \xi + \beta \widehat{C} \eta &= \lambda \eta. \end{aligned}$$

Solve  $\xi$  in the first equation in terms of  $\eta$ , then plug into the second equation, we obtain:

$$\lambda^2 \eta - \lambda(\rho \eta + \beta \widehat{C} \eta) + \beta(\widehat{A} \widehat{A}^\top \eta + \rho \widehat{C} \eta) = 0.$$

Now left multiply  $\eta^\top$ , then divide by the  $\|\eta\|_2^2$ , we have:

$$\lambda^2 - p\lambda + q = 0.$$

where  $p$  and  $q$  are defined as

$$\begin{aligned} p &\triangleq \rho + \beta \frac{\eta^\top \widehat{C} \eta}{\|\eta\|^2}, \\ q &\triangleq \beta \left( \frac{\eta^\top \widehat{A} \widehat{A}^\top \eta}{\|\eta\|^2} + \rho \frac{\eta^\top \widehat{C} \eta}{\|\eta\|^2} \right). \end{aligned} \quad (34)$$

Therefore the eigenvalues of  $G$  satisfy:

$$\lambda = \frac{p \pm \sqrt{p^2 - 4q}}{2}. \quad (35)$$

Recall that our choice of  $\beta$  ensures that  $G$  is diagonalizable and has positive real eigenvalues. Indeed, we can verify that the diagonalization condition guarantees  $p^2 \geq 4q$

so that all eigenvalues are real and positive. Now we can obtain upper and lower bounds based on (35). For upper bound, notice that

$$\begin{aligned}
 \lambda_{\max}(G) &\leq p \leq \rho + \beta \lambda_{\max}(\widehat{C}) \\
 &= \rho + \frac{8(\rho + L)}{\lambda_{\min}(\widehat{C})} \lambda_{\max}(\widehat{C}) \\
 &= \rho + 8(\rho + L)\kappa(\widehat{C}) \\
 &\leq 9\kappa(\widehat{C})(\rho + L) \\
 &= 9\kappa(\widehat{C})\lambda_{\max}(\rho I + \widehat{A}^T \widehat{C}^{-1} \widehat{A}). \quad (36)
 \end{aligned}$$

For lower bound, notice that

$$\begin{aligned}
 \lambda_{\min}(G) &\geq \frac{p - \sqrt{p^2 - 4q}}{2} \geq \frac{p - p + 2q/p}{2} = q/p \\
 &= \frac{\beta \left( \frac{\eta^T \widehat{A} \widehat{A}^T \eta}{\eta^T \widehat{C} \eta} + \rho \right)}{\rho \frac{\|\eta\|^2}{\eta^T \widehat{C} \eta} + \beta} \\
 &\stackrel{(a)}{\geq} \frac{\beta(\rho + \mu)}{\rho/\lambda_{\min}(\widehat{C}) + \beta} = \frac{\beta \lambda_{\min}(\widehat{C})(\rho + \mu)}{\rho + \beta \lambda_{\min}(\widehat{C})} \\
 &\stackrel{(b)}{=} \frac{8(\rho + L)(\rho + \mu)}{\rho + 8(\rho + L)} \\
 &\geq \frac{8}{9}(\rho + \mu) \\
 &= \frac{8}{9}(\rho + \lambda_{\min}(\widehat{A}^T \widehat{C}^{-1} \widehat{A})) \\
 &= \frac{8}{9} \lambda_{\min}(\rho I + \widehat{A}^T \widehat{C}^{-1} \widehat{A}), \quad (37)
 \end{aligned}$$

where the second inequality is by the concavity property of the square root function, step (a) used the fact

$$\mu \triangleq \lambda_{\min}(\widehat{A}^T \widehat{C}^{-1} \widehat{A}) \leq \frac{y^T \widehat{A} \widehat{A}^T y}{y^T \widehat{C} y},$$

and step (b) substitutes the expressions of  $\beta$ .

Since  $G$  is not a normal matrix, we cannot use their eigenvalue bounds to bound its condition number  $\kappa(G)$ .

## B Linear convergence of PDBG

Recall the saddle-point problem we need to solve:

$$\min_{\theta} \max_w \mathcal{L}(\theta, w),$$

where the Lagrangian is defined as

$$\mathcal{L}(\theta, w) = \frac{\rho}{2} \|\theta\|^2 - w^T \widehat{A} \theta - \frac{1}{2} w^T \widehat{C} w + \widehat{b}^T w. \quad (38)$$

Our assumption is that  $\widehat{C}$  is positive definite and  $\widehat{A}$  has full rank. The optimal solution can be expressed as

$$\theta_{\star} = \left( \widehat{A}^T \widehat{C}^{-1} \widehat{A} + \rho I \right)^{-1} \widehat{A}^T \widehat{C}^{-1} \widehat{b},$$

$$w_{\star} = \widehat{C}^{-1} \left( \widehat{b} - \widehat{A}^T \theta_{\star} \right).$$

The gradients of the Lagrangian with respect to  $\theta$  and  $w$ , respectively, are

$$\begin{aligned}
 \nabla_{\theta} \mathcal{L}(\theta, w) &= \rho \theta - \widehat{A}^T w \\
 \nabla_w \mathcal{L}(\theta, w) &= -\widehat{A} \theta - \widehat{C} w + \widehat{b}.
 \end{aligned}$$

The first-order optimality condition is obtained by setting them to zero, which is satisfied by  $(\theta_{\star}, w_{\star})$ :

$$\begin{bmatrix} \rho I & -\widehat{A}^T \\ \widehat{A} & \widehat{C} \end{bmatrix} \begin{bmatrix} \theta_{\star} \\ w_{\star} \end{bmatrix} = \begin{bmatrix} 0 \\ \widehat{b} \end{bmatrix}. \quad (39)$$

The PDBG method in Algorithm 1 takes the following iteration:

$$\begin{bmatrix} \theta_{m+1} \\ w_{m+1} \end{bmatrix} = \begin{bmatrix} \theta_m \\ w_m \end{bmatrix} - \begin{bmatrix} \sigma_{\theta} & 0 \\ 0 & \sigma_w \end{bmatrix} B(\theta_m, w_m),$$

where

$$B(\theta, w) = \begin{bmatrix} \nabla_{\theta} L(\theta, w) \\ -\nabla_w L(\theta, w) \end{bmatrix} = \begin{bmatrix} \rho I & -\widehat{A}^T \\ \widehat{A} & \widehat{C} \end{bmatrix} \begin{bmatrix} \theta \\ w \end{bmatrix} - \begin{bmatrix} 0 \\ \widehat{b} \end{bmatrix}.$$

Letting  $\beta = \sigma_w / \sigma_{\theta}$ , we have

$$\begin{bmatrix} \theta_{m+1} \\ w_{m+1} \end{bmatrix} = \begin{bmatrix} \theta_m \\ w_m \end{bmatrix} - \sigma_{\theta} \left( \begin{bmatrix} \rho I & -\widehat{A}^T \\ \beta \widehat{A} & \beta \widehat{C} \end{bmatrix} \begin{bmatrix} \theta_m \\ w_m \end{bmatrix} - \begin{bmatrix} 0 \\ \beta \widehat{b} \end{bmatrix} \right).$$

Subtracting both sides of the above recursion by  $(\theta_{\star}, w_{\star})$  and using (39), we obtain

$$\begin{bmatrix} \theta_{m+1} - \theta_{\star} \\ w_{m+1} - w_{\star} \end{bmatrix} = \begin{bmatrix} \theta_m - \theta_{\star} \\ w_m - w_{\star} \end{bmatrix} - \sigma_{\theta} \begin{bmatrix} \rho I & -\widehat{A}^T \\ \beta \widehat{A} & \beta \widehat{C} \end{bmatrix} \begin{bmatrix} \theta_m - \theta_{\star} \\ w_m - w_{\star} \end{bmatrix}.$$

We analyze the convergence of the algorithms by examining the differences between the current parameters to the optimal solution. More specifically, we define a scaled residue vector

$$\Delta_m \triangleq \begin{bmatrix} \theta_m - \theta_{\star} \\ \frac{1}{\sqrt{\beta}}(w_m - w_{\star}) \end{bmatrix}, \quad (40)$$

which obeys the following iteration:

$$\Delta_{m+1} = (I - \sigma_{\theta} G) \Delta_m, \quad (41)$$

where  $G$  is exactly the matrix defined in (20). As analyzed in Section A.1, if we choose  $\beta$  sufficiently large, such as in (22), then  $G$  is diagonalizable with all its eigenvalues real and positive. In this case, we let  $Q$  be the matrix of eigenvectors in the eigenvalue decomposition  $G = Q \Lambda Q^{-1}$ , and use the potential function

$$P_m \triangleq \|Q^{-1} \Delta_m\|_2^2$$

in our convergence analysis. We can bound the usual Euclidean distance by  $P_m$  as

$$\|\theta_m - \theta_\star\|^2 + \|w_m - w_\star\|^2 \leq (1 + \beta)\sigma_{\max}^2(Q)P_m.$$

If we have linear convergence in  $P_m$ , then the extra factor  $(1 + \beta)\sigma_{\max}^2(Q)$  will appear inside a logarithmic term.

**Remark:** This potential function has an intrinsic geometric interpretation. We can view column vectors of  $Q^{-1}$  a basis for the vector space, which is *not* orthogonal. Our goal is to show that in this coordinate system, the distance to optimal solution shrinks at every iteration.

We proceed to bound the growth of  $P_m$ :

$$\begin{aligned} P_{m+1} &= \|Q^{-1}\Delta_{m+1}\|_2^2 \\ &= \|Q^{-1}(I - \sigma_\theta G)\Delta_m\|_2^2 \\ &= \|Q^{-1}(QQ^{-1} - \sigma_\theta Q\Lambda Q^{-1})\Delta_m\|_2^2 \\ &= \|(I - \sigma_\theta\Lambda)Q^{-1}\Delta_m\|_2^2 \\ &\leq \|I - \sigma_\theta\Lambda\|_2^2 \|Q^{-1}\Delta_m\|_2^2 \\ &= \|I - \sigma_\theta\Lambda\|_2^2 P_m \end{aligned} \quad (42)$$

The inequality above uses sub-multiplicity of spectral norm. We choose  $\sigma_\theta$  to be

$$\sigma_\theta = \frac{1}{\lambda_{\max}(\Lambda)} = \frac{1}{\lambda_{\max}(G)}, \quad (43)$$

Since all eigenvalues of  $G$  are real and positive, we have

$$\begin{aligned} \|I - \sigma_\theta\Lambda\|^2 &= \left(1 - \frac{\lambda_{\min}(G)}{\lambda_{\max}(G)}\right)^2 \\ &\leq \left(1 - \frac{8}{81} \cdot \frac{1}{\kappa(\widehat{C})\kappa(\rho I + \widehat{A}^T\widehat{C}^{-1}\widehat{A})}\right)^2, \end{aligned}$$

where we used the bounds on the eigenvalues  $\lambda_{\max}(G)$  and  $\lambda_{\min}(G)$  in (36) and (37) respectively. Therefore, we can achieve an  $\epsilon$ -close solution with

$$m = O\left(\kappa(\widehat{C})\kappa(\rho I + \widehat{A}^T\widehat{C}^{-1}\widehat{A}) \log\left(\frac{P_0}{\epsilon}\right)\right)$$

iterations of the PDBG algorithm.

In order to minimize  $\|I - \sigma_\theta\Lambda\|$ , we can choose

$$\sigma_\theta = \frac{2}{\lambda_{\max}(G) + \lambda_{\min}(G)},$$

which results in  $\|I - \sigma_\theta\Lambda\| = 1 - 2/(1 + \kappa(\Lambda))$  instead of  $1 - 1/\kappa(\Lambda)$ . The resulting complexity stays the same order.

The step sizes stated in Theorem 1 is obtained by replacing  $\lambda_{\max}$  in (43) with its upper bound in (36) and setting  $\sigma_w$  through the ratio  $\beta = \sigma_w/\sigma_\theta$  as in (22).

## C Analysis of SVRG

Here we establish the linear convergence of the SVRG algorithm for policy evaluation described in Algorithm 2.

Recall the finite sum structure in  $\widehat{A}$ ,  $\widehat{b}$  and  $\widehat{C}$ :

$$\widehat{A} = \frac{1}{n} \sum_{t=1}^n A_t, \quad \widehat{b} = \frac{1}{n} \sum_{t=1}^n b_t, \quad \widehat{C} = \frac{1}{n} \sum_{t=1}^n C_t.$$

This structure carries over to the Lagrangian  $\mathcal{L}(\theta, w)$  as well as the gradient operator  $B(\theta, w)$ , so we have

$$B(\theta, w) = \frac{1}{n} \sum_{t=1}^n B_t(\theta, w),$$

where

$$B_t(\theta, w) = \begin{bmatrix} \rho I & -A_t^\top \\ A_t & C_t \end{bmatrix} \begin{bmatrix} \theta \\ w \end{bmatrix} - \begin{bmatrix} 0 \\ b_t \end{bmatrix}. \quad (44)$$

Algorithm 2 has both an outer loop and an inner loop. We use the index  $m$  for the outer iteration and  $j$  for the inner iteration. Fixing the outer loop index  $m$ , we look at the inner loop of Algorithm 2. Similar to full gradient method, we first simplify the dynamics of SVRG.

$$\begin{aligned} \begin{bmatrix} \theta_{m,j+1} \\ w_{m,j+1} \end{bmatrix} &= \begin{bmatrix} \theta_{m,j} \\ w_{m,j} \end{bmatrix} - \begin{bmatrix} \sigma_\theta & \\ & \sigma_w \end{bmatrix} \times \left( B(\theta_{m-1}, w_{m-1}) \right. \\ &\quad \left. + B_{t_j}(\theta_{m,j}, w_{m,j}) - B_t(\theta_{m-1}, w_{m-1}) \right) \\ &= \begin{bmatrix} \theta_{m,j} \\ w_{m,j} \end{bmatrix} - \begin{bmatrix} \sigma_\theta & \\ & \sigma_w \end{bmatrix} \\ &\quad \times \left( \begin{bmatrix} \rho I & -\widehat{A}^\top \\ \widehat{A} & \widehat{C} \end{bmatrix} \begin{bmatrix} \theta_{m-1} \\ w_{m-1} \end{bmatrix} - \begin{bmatrix} 0 \\ \widehat{b} \end{bmatrix} \right. \\ &\quad \left. + \begin{bmatrix} \rho I & -A_t^\top \\ A_t & C_t \end{bmatrix} \begin{bmatrix} \theta_{m,j} \\ w_{m,j} \end{bmatrix} - \begin{bmatrix} 0 \\ b_t \end{bmatrix} \right. \\ &\quad \left. - \begin{bmatrix} \rho I & -A_t^\top \\ A_t & C_t \end{bmatrix} \begin{bmatrix} \theta_{m-1} \\ w_{m-1} \end{bmatrix} + \begin{bmatrix} 0 \\ b_t \end{bmatrix} \right). \end{aligned}$$

Subtracting  $(\theta_\star, w_\star)$  from both sides and using the optimality condition (39), we have

$$\begin{aligned} \begin{bmatrix} \theta_{m,j+1} - \theta_\star \\ w_{m,j+1} - w_\star \end{bmatrix} &= \begin{bmatrix} \theta_{m,j} - \theta_\star \\ w_{m,j} - w_\star \end{bmatrix} - \begin{bmatrix} \sigma_\theta & \\ & \sigma_w \end{bmatrix} \\ &\quad \times \left( \begin{bmatrix} \rho I & -\widehat{A}^\top \\ \widehat{A} & \widehat{C} \end{bmatrix} \begin{bmatrix} \theta_{m-1} - \theta_\star \\ w_{m-1} - w_\star \end{bmatrix} \right. \\ &\quad \left. + \begin{bmatrix} \rho I & -A_t^\top \\ A_t & C_t \end{bmatrix} \begin{bmatrix} \theta_{m,j} - \theta_\star \\ w_{m,j} - w_\star \end{bmatrix} \right. \\ &\quad \left. - \begin{bmatrix} \rho I & -A_t^\top \\ A_t & C_t \end{bmatrix} \begin{bmatrix} \theta_{m-1} - \theta_\star \\ w_{m-1} - w_\star \end{bmatrix} \right). \end{aligned}$$

Multiplying both sides of the above recursion by  $\text{diag}(I, 1/\sqrt{\beta}I)$ , and using a residue vector  $\Delta_{m,j}$  defined similarly as in (40), we obtain

$$\begin{aligned} \Delta_{m,j+1} &= \Delta_{m,j} - \sigma_\theta(G\Delta_{m-1} + G_{t_j}\Delta_{m,j} - G_{t_j}\Delta_{m-1}) \\ &= (I - \sigma_\theta G)\Delta_{m,j} \\ &\quad + \sigma_\theta(G - G_{t_j})(\Delta_{m,j} - \Delta_{m-1}), \end{aligned} \quad (45)$$

where  $G_{t_j}$  is defined in (18).

For SVRG, we use the following potential functions to facilitate our analysis:

$$P_m \triangleq \mathbb{E} \left[ \|Q^{-1}\Delta_m\|^2 \right], \quad (46)$$

$$P_{m,j} \triangleq \mathbb{E} \left[ \|Q^{-1}\Delta_{m,j}\|^2 \right]. \quad (47)$$

Unlike the analysis for the batch gradient methods, the non-orthogonality of the eigenvectors will lead to additional dependency of the iteration complexity on the condition number of  $Q$ , for which we give a bound in (33).

Multiplying both sides of Eqn. (45) by  $Q^{-1}$ , taking squared 2-norm and taking expectation, we obtain

$$\begin{aligned} P_{m,j+1} &= \mathbb{E} \left[ \|Q^{-1}[(I - \sigma_\theta G)\Delta_{m,j} \right. \\ &\quad \left. + \sigma_\theta(G - G_{t_j})(\Delta_{m,j} - \Delta_{m-1})]\|^2 \right] \\ &\stackrel{(a)}{=} \mathbb{E} \left[ \|(I - \sigma_\theta \Lambda)Q^{-1}\Delta_{m,j}\|^2 \right] \\ &\quad + \sigma_\theta^2 \mathbb{E} \left[ \|Q^{-1}(G - G_{t_j})(\Delta_{m,j} - \Delta_{m-1})\|^2 \right] \\ &\stackrel{(b)}{\leq} \|I - \sigma_\theta \Lambda\|^2 \mathbb{E} \left[ \|Q^{-1}\Delta_{m,j}\|^2 \right] \\ &\quad + \sigma_\theta^2 \mathbb{E} \left[ \|Q^{-1}G_{t_j}(\Delta_{m,j} - \Delta_{m-1})\|^2 \right] \\ &\stackrel{(c)}{=} \|I - \sigma_\theta \Lambda\|^2 P_{m,j} \\ &\quad + \sigma_\theta^2 \mathbb{E} \left[ \|Q^{-1}G_{t_j}(\Delta_{m,j} - \Delta_{m-1})\|^2 \right]. \end{aligned} \quad (48)$$

where step (a) used the facts that  $G_{t_j}$  is independent of  $\Delta_{m,j}$  and  $\Delta_{m-1}$  and  $\mathbb{E}[G_{t_j}] = G$  so the cross terms are zero, step (b) used again the same independence and that the variance of a random variable is less than its second moment, and step (c) used the definition of  $P_{m,j}$  in (47). To bound the last term in the above inequality, we use the simple notation  $\delta = \Delta_{m,j} - \Delta_{m-1}$  and have

$$\begin{aligned} \|Q^{-1}G_{t_j}\delta\|^2 &= \delta^T G_{t_j}^T Q^{-T} Q^{-1} G_{t_j} \delta \\ &\leq \lambda_{\max}(Q^{-T} Q^{-1}) \delta^T G_{t_j}^T G_{t_j} \delta. \end{aligned}$$

Therefore, we can bound the expectation as

$$\begin{aligned} &\mathbb{E} \left[ \|Q^{-1}G_{t_j}\delta\|^2 \right] \\ &\leq \lambda_{\max}(Q^{-T} Q^{-1}) \mathbb{E} \left[ \delta^T G_{t_j}^T G_{t_j} \delta \right] \end{aligned}$$

$$\begin{aligned} &= \lambda_{\max}(Q^{-T} Q^{-1}) \mathbb{E} \left[ \delta^T \mathbb{E}[G_{t_j}^T G_{t_j}] \delta \right] \\ &\leq \lambda_{\max}(Q^{-T} Q^{-1}) L_G^2 \mathbb{E} \left[ \delta^T \delta \right] \\ &= \lambda_{\max}(Q^{-T} Q^{-1}) L_G^2 \mathbb{E} \left[ \delta^T Q^{-T} Q^T Q Q^{-1} \delta \right] \\ &= \lambda_{\max}(Q^{-T} Q^{-1}) \lambda_{\max}(Q^T Q) L_G^2 \mathbb{E} \left[ \delta^T Q^{-T} Q^{-1} \delta \right] \\ &\leq \kappa(Q)^2 L_G^2 \mathbb{E} \left[ \|Q^{-1}\delta\|^2 \right], \end{aligned} \quad (49)$$

where in the second inequality we used the definition of  $L_G^2$  in (18), i.e.,  $L_G^2 = \|\mathbb{E}[G_{t_j}^T G_{t_j}]\|$ . In addition, we have

$$\begin{aligned} \mathbb{E} \left[ \|Q^{-1}\delta\|^2 \right] &= \mathbb{E} \left[ \|Q^{-1}(\Delta_{m,j} - \Delta_{m-1})\|^2 \right] \\ &\leq 2 \mathbb{E} \left[ \|Q^{-1}\Delta_{m,j}\|^2 \right] + 2 \mathbb{E} \left[ \|Q^{-1}\Delta_{m-1}\|^2 \right] \\ &= 2P_{m,j} + 2P_{m-1}. \end{aligned}$$

Then it follows from (48) that

$$\begin{aligned} P_{m,j+1} &\leq \|I - \sigma_\theta \Lambda\|^2 P_{m,j} \\ &\quad + 2\sigma_\theta^2 \kappa^2(Q) L_G^2 (P_{m,j} + P_{m-1}). \end{aligned}$$

Next, let  $\lambda_{\max}$  and  $\lambda_{\min}$  denote the largest and smallest diagonal elements of  $\Lambda$  (eigenvalues of  $G$ ), respectively. Then we have

$$\begin{aligned} \|I - \sigma_\theta \Lambda\|^2 &= \max \left\{ (1 - \sigma_\theta \lambda_{\min})^2, (1 - \sigma_\theta \lambda_{\max})^2 \right\} \\ &\leq 1 - 2\sigma_\theta \lambda_{\min} + \sigma_\theta^2 \lambda_{\max}^2 \\ &\leq 1 - 2\sigma_\theta \lambda_{\min} + \sigma_\theta^2 \kappa^2(Q) L_G^2, \end{aligned}$$

where the last inequality uses the relation

$$\lambda_{\max}^2 \leq \|G\|^2 = \|\mathbb{E}G_t\|^2 \leq \|\mathbb{E}G_t^T G_t\| = L_G^2 \leq \kappa^2(Q) L_G^2.$$

It follows that

$$\begin{aligned} P_{m,j+1} &\leq (1 - 2\sigma_\theta \lambda_{\min} + \sigma_\theta^2 \kappa^2(Q) L_G^2) P_{m,j} \\ &\quad + 2\sigma_\theta^2 \kappa^2(Q) L_G^2 (P_{m,j} + P_{m-1}) \\ &= [1 - 2\sigma_\theta \lambda_{\min} + 3\sigma_\theta^2 \kappa^2(Q) L_G^2] P_{m,j} \\ &\quad + 2\sigma_\theta^2 \kappa^2(Q) L_G^2 P_{m-1} \end{aligned}$$

If we choose  $\sigma_\theta$  to satisfy

$$0 < \sigma_\theta \leq \frac{\lambda_{\min}}{3\kappa^2(Q) L_G^2}, \quad (50)$$

then  $3\sigma_\theta^2 \kappa^2(Q) L_G^2 < \sigma_\theta \lambda_{\min}$ , which implies

$$P_{m,j+1} \leq (1 - \sigma_\theta \lambda_{\min}) P_{m,j} + 2\sigma_\theta^2 \kappa^2(Q) L_G^2 P_{m-1}.$$

Iterating the above inequality over  $j = 1, \dots, N-1$  and using  $P_{m,0} = P_{m-1}$  and  $P_{m,N} = P_m$ , we obtain

$$\begin{aligned} P_m &= P_{m,N} \\ &\leq \left[ (1 - \sigma_\theta \lambda_{\min})^N + 2\sigma_\theta^2 \kappa^2(Q) L_G^2 \sum_{j=0}^{N-1} (1 - \sigma_\theta \lambda_{\min})^j \right] P_{m-1} \end{aligned}$$

$$\begin{aligned}
 &= \left[ (1 - \sigma_\theta \lambda_{\min})^N + 2\sigma_\theta^2 \kappa^2(Q) L_G^2 \frac{1 - (1 - \sigma_\theta \lambda_{\min})^N}{1 - (1 - \sigma_\theta \lambda_{\min})} \right] P_{m-1} \\
 &\leq \left[ (1 - \sigma_\theta \lambda_{\min})^N + \frac{2\sigma_\theta^2 \kappa^2(Q) L_G^2}{\sigma_\theta \lambda_{\min}} \right] P_{m-1} \\
 &= \left[ (1 - \sigma_\theta \lambda_{\min})^N + \frac{2\sigma_\theta \kappa^2(Q) L_G^2}{\lambda_{\min}} \right] P_{m-1}. \quad (51)
 \end{aligned}$$

We can choose

$$\sigma_\theta = \frac{\lambda_{\min}}{5\kappa^2(Q)L_G^2}, \quad N = \frac{1}{\sigma_\theta \lambda_{\min}} = \frac{5\kappa^2(Q)L_G^2}{\lambda_{\min}^2}, \quad (52)$$

which satisfies the condition in (50) and results in

$$P_m \leq (e^{-1} + 2/5)P_{m-1} \leq (4/5)P_{m-1}.$$

There are many other similar choices, for example,

$$\sigma_\theta = \frac{\lambda_{\min}}{3\kappa^2(Q)L_G^2}, \quad N = \frac{3}{\sigma_\theta \lambda_{\min}} = \frac{9\kappa^2(Q)L_G^2}{\lambda_{\min}^2},$$

which results in

$$P_m \leq (e^{-3} + 2/3)P_{m-1} \leq (3/4)P_{m-1}.$$

These results imply that the number of outer iterations needed to have  $\mathbb{E}[P_m] \leq \epsilon$  is  $\log(P_0/\epsilon)$ . For each outer iteration, the SVRG algorithm need  $O(nd)$  operations to compute the full gradient operator  $B(\theta, w)$ , and then  $N = O(\kappa^2(Q)L_G^2/\lambda_{\min}^2)$  inner iterations with each costing  $O(d)$  operations. Therefore the overall computational cost is

$$O\left(\left(n + \frac{\kappa^2(Q)L_G^2}{\lambda_{\min}^2}\right) d \log\left(\frac{P_0}{\epsilon}\right)\right).$$

Substituting (33) and (37) in the above bound, we get the overall cost estimate

$$O\left(\left(n + \frac{\kappa(\widehat{C})L_G^2}{\lambda_{\min}^2(\rho I + \widehat{A}^T \widehat{C}^{-1} \widehat{A})}\right) d \log\left(\frac{P_0}{\epsilon}\right)\right).$$

Finally, substituting the bounds in (33) and (37) into (52), we obtain the  $\sigma_\theta$  and  $N$  stated in Theorem 2:

$$\begin{aligned}
 \sigma_\theta &= \frac{\lambda_{\min}(\rho I + \widehat{A}^T \widehat{C}^{-1} \widehat{A})}{48\kappa(\widehat{C})L_G^2}, \\
 N &= \frac{51\kappa^2(\widehat{C})L_G^2}{\lambda_{\min}^2(\rho I + \widehat{A}^T \widehat{C}^{-1} \widehat{A})},
 \end{aligned}$$

which achieves the same complexity.

## D Analysis of SAGA

SAGA in Algorithm 3 maintains a table of previously computed gradients. Notation wise, we use  $\phi_t^m$  to denote that

at  $m$ -th iteration,  $g_t$  is computed using  $\theta_{\phi_t^m}$  and  $w_{\phi_t^m}$ . With this definition,  $\phi_t^m$  has the following dynamics:

$$\phi_t^{m+1} = \begin{cases} \phi_t^m & \text{if } t_m \neq t, \\ m & \text{if } t_m = t. \end{cases} \quad (53)$$

We can write the  $m$ -th iteration's full gradient as

$$B = \frac{1}{n} \sum_{t=1}^n B_t(\theta_{\phi_t^m}, w_{\phi_t^m}).$$

For convergence analysis, we define the following quantity:

$$\Delta_{\phi_t^m} \triangleq \begin{bmatrix} \theta_{\phi_t^m} - \theta_\star \\ \frac{1}{\sqrt{\beta}}(w_{\phi_t^m} - w_\star) \end{bmatrix}. \quad (54)$$

Similar to (53), it satisfies the following iterative relation:

$$\Delta_{\phi_t^{m+1}} = \begin{cases} \Delta_{\phi_t^m} & \text{if } t_m \neq t, \\ \Delta_m & \text{if } t_m = t. \end{cases}$$

With these notations, we can express the vectors used in SAGA as

$$\begin{aligned}
 B_m &= \frac{1}{n} \sum_{t=1}^n \begin{bmatrix} \rho I & -A_t^T \\ A_t & C_t \end{bmatrix} \begin{bmatrix} \theta_{\phi_t^m} \\ w_{\phi_t^m} \end{bmatrix} - \frac{1}{n} \sum_{t=1}^n \begin{bmatrix} 0 \\ b_t \end{bmatrix}, \\
 h_{t_m} &= \begin{bmatrix} \rho I & -A_{t_m}^T \\ A_{t_m} & C_{t_m} \end{bmatrix} \begin{bmatrix} \theta_m \\ w_m \end{bmatrix} - \begin{bmatrix} 0 \\ b_{t_m} \end{bmatrix}, \\
 g_{t_m} &= \begin{bmatrix} \rho I & -A_{t_m}^T \\ A_{t_m} & C_{t_m} \end{bmatrix} \begin{bmatrix} \theta_{\phi_{t_m}^m} \\ w_{\phi_{t_m}^m} \end{bmatrix} - \begin{bmatrix} 0 \\ b_{t_m} \end{bmatrix}.
 \end{aligned}$$

The dynamics of SAGA can be written as

$$\begin{aligned}
 \begin{bmatrix} \theta_{m+1} \\ w_{m+1} \end{bmatrix} &= \begin{bmatrix} \theta_m \\ w_m \end{bmatrix} - \begin{bmatrix} \sigma_\theta & \\ & \sigma_w \end{bmatrix} (B_m + h_{t_m} - g_{t_m}) \\
 &= \begin{bmatrix} \theta_m \\ w_m \end{bmatrix} - \begin{bmatrix} \sigma_\theta & \\ & \sigma_w \end{bmatrix} \\
 &\quad \left\{ \frac{1}{n} \sum_{t=1}^n \begin{bmatrix} \rho I & -A_t^T \\ A_t & C_t \end{bmatrix} \begin{bmatrix} \theta_{\phi_t^m} \\ w_{\phi_t^m} \end{bmatrix} + \frac{1}{n} \sum_{t=1}^n \begin{bmatrix} 0 \\ b_t \end{bmatrix} \right. \\
 &\quad \left. + \begin{bmatrix} \rho I & -A_{t_m}^T \\ A_{t_m} & C_{t_m} \end{bmatrix} \begin{bmatrix} \theta_m \\ w_m \end{bmatrix} - \begin{bmatrix} \rho I & -A_{t_m}^T \\ A_{t_m} & C_{t_m} \end{bmatrix} \begin{bmatrix} \theta_{\phi_{t_m}^m} \\ w_{\phi_{t_m}^m} \end{bmatrix} \right\}
 \end{aligned}$$

Subtracting  $(\theta_\star, w_\star)$  from both sides, and using the optimality condition in (39), we obtain

$$\begin{aligned}
 \begin{bmatrix} \theta_{m+1} - \theta_\star \\ w_{m+1} - w_\star \end{bmatrix} &= \begin{bmatrix} \theta_m - \theta_\star \\ w_m - w_\star \end{bmatrix} - \begin{bmatrix} \sigma_\theta & \\ & \sigma_w \end{bmatrix} \\
 &\quad \left\{ \frac{1}{n} \sum_{t=1}^n \begin{bmatrix} \rho I & -A_t^T \\ A_t & C_t \end{bmatrix} \begin{bmatrix} \theta_{\phi_t^m} - \theta_\star \\ w_{\phi_t^m} - w_\star \end{bmatrix} \right. \\
 &\quad \left. + \begin{bmatrix} \rho I & -A_{t_m}^T \\ A_{t_m} & C_{t_m} \end{bmatrix} \begin{bmatrix} \theta_m - \theta_\star \\ w_m - w_\star \end{bmatrix} \right.
 \end{aligned}$$

$$- \begin{bmatrix} \rho I & -A_{t_m}^T \\ A_{t_m} & C_{t_m} \end{bmatrix} \begin{bmatrix} \theta_{\phi_{t_m}^m} - \theta_* \\ w_{\phi_{t_m}^m} - w_* \end{bmatrix} \Big\}.$$

Multiplying both sides by  $\text{diag}(I, 1/\sqrt{\beta}I)$ , we get

$$\begin{aligned} \Delta_{m+1} &= \Delta_m - \left( \frac{\sigma_\theta}{n} \sum_{t=1}^n G_t \Delta_{\phi_t^m} \right) \\ &\quad - \sigma_\theta G_{t_m} (\Delta_m - \Delta_{\phi_{t_m}^m}). \end{aligned} \quad (55)$$

where  $G_{t_m}$  is defined in (18).

For SAGA, we use the following two potential functions:

$$\begin{aligned} P_m &= \mathbb{E} \left\| Q^{-1} \Delta_m \right\|_2^2, \\ Q_m &= \mathbb{E} \left[ \frac{1}{n} \sum_{t=1}^n \left\| Q^{-1} G_t \Delta_{\phi_t^m} \right\|_2^2 \right] = \mathbb{E} \left[ \left\| Q^{-1} G_{t_m} \Delta_{\phi_{t_m}^m} \right\|_2^2 \right]. \end{aligned}$$

The last equality holds because we use uniform sampling. We first look at how  $P_m$  evolves. To simplify notation, let

$$v_m = \left( \frac{\sigma_\theta}{n} \sum_{t=1}^n G_t \Delta_{\phi_t^m} \right) + \sigma_\theta G_{t_m} (\Delta_m - \Delta_{\phi_{t_m}^m}),$$

so that (55) becomes  $\Delta_{m+1} = \Delta_m - v_m$ . We have

$$\begin{aligned} P_{m+1} &= \mathbb{E} \left[ \left\| Q^{-1} \Delta_{m+1} \right\|_2^2 \right] \\ &= \mathbb{E} \left[ \left\| Q^{-1} (\Delta_m - v_m) \right\|_2^2 \right] \\ &= \mathbb{E} \left[ \left\| Q^{-1} \Delta_m \right\|_2^2 - 2 \Delta_m^\top Q^{-\top} Q^{-1} v_m + \left\| Q^{-1} v_m \right\|_2^2 \right] \\ &= P_m - \mathbb{E} \left[ 2 \Delta_m^\top Q^{-\top} Q^{-1} v_m \right] + \mathbb{E} \left[ \left\| Q^{-1} v_m \right\|_2^2 \right]. \end{aligned}$$

Since  $\Delta_m$  is independent of  $t_m$ , we have

$$\mathbb{E} \left[ 2 \Delta_m^\top Q^{-\top} Q^{-1} v_m \right] = \mathbb{E} \left[ 2 \Delta_m^\top Q^{-\top} Q^{-1} \mathbb{E}_{t_m} [v_m] \right],$$

where the inner expectation is with respect to  $t_m$  conditioned on all previous random variables. Notice that

$$\mathbb{E}_{t_m} [G_{t_m} \Delta_{\phi_{t_m}^m}] = \frac{1}{n} \sum_{t=1}^n G_t \Delta_{\phi_t^m},$$

which implies  $\mathbb{E}_{t_m} [v_m] = \sigma_\theta \mathbb{E}_{t_m} [G_{t_m}] \Delta_m = \sigma_\theta G \Delta_m$ . Therefore, we have

$$\begin{aligned} P_{m+1} &= P_m - \mathbb{E} \left[ 2 \sigma_\theta \Delta_m^\top Q^{-\top} Q^{-1} G \Delta_m \right] + \mathbb{E} \left[ \left\| Q^{-1} v_m \right\|_2^2 \right] \\ &= P_m - \mathbb{E} 2 \sigma_\theta \left[ \Delta_m^\top Q^{-\top} \Lambda Q^{-1} \Delta_m \right] + \mathbb{E} \left[ \left\| Q^{-1} v_m \right\|_2^2 \right] \\ &\leq P_m - 2 \sigma_\theta \lambda_{\min} \mathbb{E} \left[ \left\| Q^{-1} \Delta_m \right\|_2^2 \right] + \mathbb{E} \left[ \left\| Q^{-1} v_m \right\|_2^2 \right] \\ &= (1 - 2 \sigma_\theta \lambda_{\min}) P_m + \mathbb{E} \left[ \left\| Q^{-1} v_m \right\|_2^2 \right], \end{aligned} \quad (56)$$

where the inequality used  $\lambda_{\min} \triangleq \lambda_{\min}(\Lambda) = \lambda_{\min}(G) > 0$ , which is true under our choice of  $\beta = \sigma_w/\sigma_\theta$  in Section A.1. Next, we bound the last term of Eqn. (56):

$$\begin{aligned} &\mathbb{E} \left[ \left\| Q^{-1} v_m \right\|_2^2 \right] \\ &= \mathbb{E} \left[ \left\| Q^{-1} \left( \frac{\sigma_\theta}{n} \sum_{t=1}^n G_t \Delta_{\phi_t^m} + \sigma_\theta G_{t_m} (\Delta_m - \Delta_{\phi_{t_m}^m}) \right) \right\|_2^2 \right] \\ &\leq 2 \sigma_\theta^2 \mathbb{E} \left[ \left\| Q^{-1} G_{t_m} \Delta_m \right\|_2^2 \right] \\ &\quad + 2 \sigma_\theta^2 \mathbb{E} \left[ \left\| Q^{-1} \left( \frac{1}{n} \sum_{t=1}^n G_t \Delta_{\phi_t^m} - G_{t_m} \Delta_{\phi_{t_m}^m} \right) \right\|_2^2 \right] \\ &\leq 2 \sigma_\theta^2 \mathbb{E} \left[ \left\| Q^{-1} G_{t_m} \Delta_m \right\|_2^2 \right] + 2 \sigma_\theta^2 \mathbb{E} \left[ \left\| Q^{-1} G_{t_m} \Delta_{\phi_{t_m}^m} \right\|_2^2 \right] \\ &= 2 \sigma_\theta^2 \mathbb{E} \left[ \left\| Q^{-1} G_{t_m} \Delta_m \right\|_2^2 \right] + 2 \sigma_\theta^2 Q_m, \end{aligned}$$

where the first inequality uses  $\|a + b\|_2^2 \leq 2\|a\|_2^2 + 2\|b\|_2^2$ , and the second inequality holds because for any random variable  $\xi$ ,  $\mathbb{E} \|\xi - \mathbb{E}[\xi]\|_2^2 = \mathbb{E} \|\xi\|_2^2 - \|\mathbb{E}[\xi]\|_2^2 \leq \mathbb{E} \|\xi\|_2^2$ . Using similar arguments as in (49), we have

$$\mathbb{E} \left[ \left\| Q^{-1} G_{t_m} \Delta_m \right\|_2^2 \right] \leq \kappa^2(Q) L_G^2 P_m, \quad (57)$$

Therefore, we have

$$\begin{aligned} P_{m+1} &\leq (1 - 2 \sigma_\theta \lambda_{\min} + 2 \sigma_\theta^2 \kappa^2(Q) L_G^2) P_m \\ &\quad + 2 \sigma_\theta^2 Q_m. \end{aligned} \quad (58)$$

The inequality (58) shows that the dynamics of  $P_m$  depends on both  $P_m$  itself and  $Q_m$ . So we need to find another iterative relation for  $P_m$  and  $Q_m$ . To this end, we have

$$\begin{aligned} Q_{m+1} &= \mathbb{E} \left[ \frac{1}{n} \sum_{t=1}^n \left\| Q^{-1} G_t \Delta_{\phi_t^{m+1}} \right\|_2^2 \right] \\ &= \mathbb{E} \left[ \frac{1}{n} \left\| Q^{-1} G_{t_m} \Delta_{\phi_{t_m}^{m+1}} \right\|_2^2 \right. \\ &\quad \left. + \frac{1}{n} \sum_{t \neq t_m} \left\| Q^{-1} G_t \Delta_{\phi_t^{m+1}} \right\|_2^2 \right] \\ &\stackrel{(a)}{=} \mathbb{E} \left[ \frac{1}{n} \left\| Q^{-1} G_{t_m} \Delta_m \right\|_2^2 \right. \\ &\quad \left. + \frac{1}{n} \sum_{t \neq t_m} \left\| Q^{-1} G_t \Delta_{\phi_t^m} \right\|_2^2 \right] \\ &= \mathbb{E} \left[ \frac{1}{n} \left\| Q^{-1} G_{t_m} \Delta_m \right\|_2^2 - \frac{1}{n} \left\| Q^{-1} G_{t_m} \Delta_{\phi_{t_m}^m} \right\|_2^2 \right. \\ &\quad \left. + \frac{1}{n} \sum_{t=1}^n \left\| Q^{-1} G_t \Delta_{\phi_t^m} \right\|_2^2 \right] \\ &= \frac{1}{n} \mathbb{E} \left[ \left\| Q^{-1} G_{t_m} \Delta_m \right\|_2^2 \right] - \frac{1}{n} \mathbb{E} \left[ \left\| Q^{-1} G_{t_m} \Delta_{\phi_{t_m}^m} \right\|_2^2 \right] \\ &\quad + \mathbb{E} \left[ \frac{1}{n} \sum_{t=1}^n \left\| Q^{-1} G_t \Delta_{\phi_t^m} \right\|_2^2 \right] \end{aligned}$$



$$\begin{aligned}
 &= \frac{1}{n} \mathbb{E}[\|Q^{-1}G_{t_m} \Delta_m\|^2] - \frac{1}{n} \mathbb{E}[\|Q^{-1}G_{t_m} \Delta_{\phi_{t_m}^m}\|^2] \\
 &\quad + \mathbb{E}\left[\|Q^{-1}G_{t_m} \Delta_{\phi_{t_m}^m}\|^2\right] \\
 &= \frac{1}{n} \mathbb{E}[\|Q^{-1}G_{t_m} \Delta_m\|^2] + \frac{n-1}{n} Q_m \\
 &\stackrel{(b)}{\leq} \frac{\kappa^2(Q)L_G^2}{n} P_m + \frac{n-1}{n} Q_m. \tag{59}
 \end{aligned}$$

where step (a) uses (53) and step (b) uses (57).

To facilitate our convergence analysis on  $P_m$ , we construct a new Lyapunov function which is a linear combination of Eqn. (58) and Eqn. (59). Specifically, consider

$$T_m = P_m + \frac{n\sigma_\theta\lambda_{\min}(1-\sigma_\theta\lambda_{\min})}{\kappa^2(Q)L_G^2} Q_m.$$

Now consider the dynamics of  $T_m$ . We have

$$\begin{aligned}
 T_{m+1} &= P_{m+1} + \frac{n\sigma_\theta\lambda_{\min}(1-\sigma_\theta\lambda_{\min})}{\kappa^2(Q)L_G^2} Q_{m+1} \\
 &\leq (1-2\sigma_\theta\lambda_{\min}+2\sigma_\theta^2\kappa^2(Q)L_G^2)P_m + 2\sigma_\theta^2Q_m \\
 &\quad + \frac{n\sigma_\theta\lambda_{\min}(1-\sigma_\theta\lambda_{\min})}{\kappa^2(Q)L_G^2} \left(\frac{\kappa^2(Q)L_G^2}{n}P_m + \frac{n-1}{n}Q_m\right) \\
 &= (1-\sigma_\theta\lambda_{\min}+2\sigma_\theta^2\kappa^2(Q)L_G^2-\sigma_\theta^2\lambda_{\min}^2)P_m \\
 &\quad + \frac{2\sigma_\theta^2\kappa^2(Q)L_G^2+(n-1)\sigma_\theta\lambda_{\min}(1-\sigma_\theta\lambda_{\min})}{\kappa^2(Q)L_G^2}Q_m.
 \end{aligned}$$

Let's define

$$\rho = \sigma_\theta\lambda_{\min} - 2\sigma_\theta^2\kappa^2(Q)L_G^2.$$

The coefficient for  $P_m$  in the previous inequality can be upper bounded by  $1-\rho$  because  $1-\rho-\sigma_\theta^2\lambda_{\min}^2 \leq 1-\rho$ . Then we have

$$\begin{aligned}
 T_{m+1} &\leq (1-\rho)P_m + \frac{2\sigma_\theta^2\kappa^2(Q)L_G^2+(n-1)\sigma_\theta\lambda_{\min}(1-\sigma_\theta\lambda_{\min})}{\kappa^2(Q)L_G^2}Q_m \\
 &= (1-\rho)\left(P_m + \frac{n\sigma_\theta\lambda_{\min}(1-\sigma_\theta\lambda_{\min})}{\kappa^2(Q)L_G^2}Q_m\right) \\
 &\quad + \sigma_\theta\frac{2\sigma_\theta\kappa^2(Q)L_G^2+(n\rho-1)\lambda_{\min}(1-\sigma_\theta\lambda_{\min})}{\kappa^2(Q)L_G^2}Q_m \\
 &= (1-\rho)T_m \\
 &\quad + \sigma_\theta\frac{2\sigma_\theta\kappa^2(Q)L_G^2+(n\rho-1)\lambda_{\min}(1-\sigma_\theta\lambda_{\min})}{\kappa^2(Q)L_G^2}Q_m. \tag{60}
 \end{aligned}$$

Next we show that with the step size

$$\sigma_\theta = \frac{\lambda_{\min}}{3(\kappa^2(Q)L_G^2+n\lambda_{\min}^2)} \tag{61}$$

(or smaller), the second term on the right-hand side of (60) is non-positive. To see this, we first notice that with this choice of  $\sigma_\theta$ , we have

$$\frac{\lambda_{\min}^2}{9(\kappa^2(Q)L_G^2+n\lambda_{\min}^2)} \leq \rho \leq \frac{\lambda_{\min}^2}{3(\kappa^2(Q)L_G^2+n\lambda_{\min}^2)},$$

which implies

$$n\rho - 1 \leq \frac{n\lambda_{\min}^2}{3(\kappa^2(Q)L_G^2+n\lambda_{\min}^2)} - 1 \leq \frac{1}{3} - 1 = -\frac{2}{3}.$$

Then, it holds that

$$\begin{aligned}
 &2\sigma_\theta\kappa^2(Q)L_G^2 + (n\rho-1)\lambda_{\min}(1-\sigma_\theta\lambda_{\min}) \\
 &\leq 2\sigma_\theta\kappa^2(Q)L_G^2 - \frac{2}{3}\lambda_{\min}(1-\sigma_\theta\lambda_{\min}) \\
 &= -\frac{(6n-2)\lambda_{\min}^3}{9(\kappa^2(Q)L_G^2+n\lambda_{\min}^2)} < 0.
 \end{aligned}$$

Therefore (60) implies

$$T_{m+1} \leq (1-\rho)T_m.$$

Notice that  $P_m \leq T_m$  and  $Q_0 = P_0$ . Therefore we have  $T_0 \leq 2P_0$  and

$$P_m \leq 2(1-\rho)^m P_0.$$

Using (61), we have

$$\rho = \sigma_\theta\lambda_{\min}(G) - 2\sigma_\theta^2\kappa^2(Q)L_G^2 \geq \frac{\lambda_{\min}^2}{9(\kappa^2(Q)L_G^2+n\lambda_{\min}^2)}.$$

To achieve  $P_m \leq \epsilon$ , we need at most

$$m = O\left(\left(n + \frac{\kappa^2(Q)L_G^2}{\lambda_{\min}^2}\right) \log\left(\frac{P_0}{\epsilon}\right)\right)$$

iterations. Substituting (37) and (33) in the above bound, we get the desired iteration complexity

$$O\left(\left(n + \frac{\kappa(\widehat{C})L_G^2}{\lambda_{\min}^2(\rho I + \widehat{A}^T \widehat{C}^{-1} \widehat{A})}\right) \log\left(\frac{P_0}{\epsilon}\right)\right).$$

Finally, using the bounds in (33) and (37), we can replace the step size in (61) by

$$\sigma_\theta = \frac{\mu_\rho}{3(8\kappa^2(\widehat{C})L_G^2+n\mu_\rho^2)},$$

where  $\mu_\rho = \lambda_{\min}^2(\rho I + \widehat{A}^T \widehat{C}^{-1} \widehat{A})$  as defined in (14).
